**Conclusion:** In this nationwide analysis we show that almost 20% of patients require ongoing IBD medications following TC for UC. Younger age is associated with higher rate of subsequent medication use. Patient expectations need be adjusted to account for the potential ongoing requirement of long-term medication following TC.

## DOP51

### De-escalation of biological therapy in Inflammatory Bowel Disease patients following prior escalation

P. Thomas<sup>\*1</sup>, L. Smits<sup>1</sup>, M. Te Groen<sup>1</sup>, R. West<sup>2</sup>, M. Russel<sup>3</sup>, J. Jansen<sup>4</sup>, T. Römkens<sup>5</sup>, F. Hoentjen<sup>1</sup>

<sup>1</sup>Radboudumc, Gastroenterology and Hepatology, Nijmegen, The Netherlands, <sup>2</sup>Franciscus Gasthuis & Vlietland, Gastroenterology and Hepatology, Rotterdam, The Netherlands, <sup>3</sup>Medisch Spectrum Twente, Gastroenterology and Hepatology, Enschede, The Netherlands, <sup>4</sup>Onze Lieve Vrouwe Gasthuis, Gastroenterology and Hepatology, Amsterdam, The Netherlands, <sup>5</sup>Jeroen Bosch Ziekenhuis, Gastroenterology and Hepatology, 's-Hertogenbosch, The Netherlands

**Background:** There are limited data available on de-escalation of biological therapy after prior escalation in inflammatory bowel disease (IBD) patients. The aim of this study was to assess the frequency and success rate of de-escalation of biological therapy in IBD patients after prior dose escalation and evaluate which measures are used prior to de-escalation.

**Methods:** This multicentre, prospective, cohort study enrolled IBD patients treated with infliximab (IFX), adalimumab (ADA) or vedolizumab (VEDO) in whom therapy was de-escalated at least once after prior biological escalation. Objective disease measures for de-escalation were defined as faecal calprotectin  $\leq 200$   $\mu\text{g/g}$  and/or therapeutic or supratherapeutic trough levels and/or radiologic or endoscopic remission. Successful de-escalation was defined as remaining on the same or lower biological dose for  $\geq 6$  months after de-escalation.

**Results:** In total, 206 IFX users, 85 ADA users and 55 VEDO users underwent therapy escalation. Of these, 34 (17%) patients on IFX, 18 (21%) patients on ADA and 8 (15%) patients on VEDO had received at least one subsequent de-escalation. De-escalation was successful in 91% of IFX patients, 89% of ADA patients and 100% of VEDO patients. The probability of remaining on the de-escalated regimen or further de-escalation after 1 year was 85% for IFX, 62% for ADA and 100% for VEDO. De-escalation based on objective disease measures was performed in 67% of all de-escalations. Objective de-escalations were successful in 98% versus 80% of subjective de-escalations.

**Conclusion:** De-escalation after biological escalation is successful in the majority of patients. Objective markers of remission increase the likelihood of successful de-escalation.

## DOP52

### Safety of Inflammatory Bowel Disease drugs during pregnancy and breastfeeding: Mothers and babies' outcomes (DUMBO registry)

M. Chaparro<sup>\*1</sup>, M. García Donday<sup>1</sup>, C. Calviño Suarez<sup>2</sup>, S. Rubio<sup>3</sup>, M. Figueira<sup>4</sup>, I. Pérez Martínez<sup>5</sup>, E. Leo Carnerero<sup>6</sup>, I. Rodríguez Lago<sup>7</sup>, A. Ruiz Cerulla<sup>8</sup>, M. Aguas<sup>9</sup>, P. López Serrano<sup>10</sup>, P. Ramírez de la Piscina Urraca<sup>11</sup>, M. Rivero<sup>12</sup>, C. Suarez Ferrer<sup>13</sup>, E. Alfambra Cabrejas<sup>14</sup>, R. Armesto<sup>15</sup>, M.T. Diz-Lois Palomares<sup>16</sup>, I. Guerra<sup>17</sup>, J.M. Vázquez Morón<sup>18</sup>, M.J. Casanova<sup>1</sup>, D. Hervías Cruz<sup>19</sup>, J.M. Huguet<sup>20</sup>, M.Á. de Jorge Turrión<sup>21</sup>, S. Marín Pedrosa<sup>22</sup>, G. Molina Arriero<sup>23</sup>, L. Ramos<sup>24</sup>, B. Zúñiga de Mora-Figueroa<sup>25</sup>, R. Camargo Camero<sup>26</sup>, A. Fernández-Clotet<sup>27</sup>, A. Gutiérrez Casbas<sup>28</sup>, P. Martínez Montiel<sup>29</sup>, R. Rodríguez Insa<sup>30</sup>, P. Sendra Rumbau<sup>31</sup>, C. Tardillo Marín<sup>32</sup>, R. Vicente Lidón<sup>33</sup>, L. Arias García<sup>34</sup>, L. Bujanda<sup>35</sup>, A.J. Lucendo<sup>36</sup>, N. Manceño Marcos<sup>37</sup>, J.P. Gisbert<sup>1</sup>, on behalf of DUMBO study group

<sup>1</sup>Hospital Universitario de La Princesa- Instituto de Investigación Sanitaria Princesa IIS-IP- Centro de Investigación Biomédica en Red de Enfermedades Hepáticas y Digestivas CIBEREHD, Gastroenterology Unit, Madrid, Spain, <sup>2</sup>Complejo Hospitalario Universitario de Santiago de Compostela, Gastroenterology Unit, Santiago de Compostela, Spain, <sup>3</sup>Complejo Hospitalario Universitario de Navarra, Gastroenterology Unit, Pamplona, Spain, <sup>4</sup>Xerencia Xestión Integrada de Vigo- SERGAS. Grupo de Investigación de Patología Digestiva. Instituto de Investigación Sanitaria Galicia Sur IIS Galicia Sur. SERGAS UVIGO, Gastroenterology Unit, Vigo, Spain, <sup>5</sup>Hospital Universitario Central de Asturias e Instituto de Investigación Sanitaria del Principado de Asturias ISPA, Gastroenterology Unit, Oviedo, Spain, <sup>6</sup>Hospital Universitario Virgen del Rocío, Gastroenterology Unit, Sevilla, Spain, <sup>7</sup>Hospital de Galdakao-Usansolo, Gastroenterology Unit, Vizcaya, Spain, <sup>8</sup>Hospital Universitario de Bellvitge, Gastroenterology Unit, Barcelona, Spain, <sup>9</sup>Hospital Universitario y Politécnico La Fe and CIBEREHD, Gastroenterology Unit, Valencia, Spain, <sup>10</sup>Hospital Universitario Fundación Alcorcón, Gastroenterology Unit, Madrid, Spain, <sup>11</sup>Hospital Universitario de Álava, Gastroenterology Unit, Álava, Spain, <sup>12</sup>Hospital Universitario Marqués de Valdecilla e IDIVAL, Gastroenterology Unit, Santander, Spain, <sup>13</sup>Hospital Universitario La Paz, Gastroenterology Unit, Madrid, Spain, <sup>14</sup>Hospital Clínico Universitario Lozano Blesa and Fundación del Instituto de Investigación Sanitaria de Aragón IIS Aragón and CIBEREHD, Gastroenterology Unit, Zaragoza, Spain, <sup>15</sup>Complejo Hospitalario Universitario de Ourense, Gastroenterology Unit, Ourense, Spain, <sup>16</sup>Complejo Hospitalario Universitario de A Coruña, Gastroenterology Unit, A Coruña, Spain, <sup>17</sup>Hospital Universitario de Fuenlabrada e Instituto de Investigación Hospital Universitario La Paz IdiPAZ, Gastroenterology Unit, Madrid, Spain, <sup>18</sup>Hospital Universitario Juan Ramón Jiménez, Gastroenterology Unit, Huelva, Spain, <sup>19</sup>Hospital General Universitario de Ciudad Real, Gastroenterology Unit, Ciudad Real, Spain, <sup>20</sup>Hospital General Universitario de Valencia, Gastroenterology Unit, Valencia, Spain, <sup>21</sup>Hospital Universitario de Cabueñes, Gastroenterology Unit, Gijón, Spain, <sup>22</sup>Hospital Universitario Reina Sofía, Gastroenterology Unit, Córdoba, Spain, <sup>23</sup>Complejo Hospitalario Universitario de Ferrol, Gastroenterology Unit, A Coruña, Spain, <sup>24</sup>Hospital Universitario de Canarias, Gastroenterology Unit, Tenerife, Spain, <sup>25</sup>Hospital Clínico

Universitario San Cecilio, Gastroenterology Unit, Granada, Spain, <sup>26</sup>Hospital Universitario Virgen de La Victoria, Gastroenterology Unit, Málaga, Spain, <sup>27</sup>Hospital Universitario Clínic i Provincial and CIBEREHD, Gastroenterology Unit, Barcelona, Spain, <sup>28</sup>Hospital General Universitario de Alicante- CIBEREhd and Instituto de Investigación Sanitaria y Biomédica de Alicante ISABIAL, Gastroenterology Unit, Alicante, Spain, <sup>29</sup>Hospital Universitario 12 de Octubre, Gastroenterology Unit, Madrid, Spain, <sup>30</sup>Hospital General Universitario de Castellón, Gastroenterology Unit, Castellón, Spain, <sup>31</sup>Hospital Universitario Son Espases, Gastroenterology Unit, Palma de Mallorca, Spain, <sup>32</sup>Hospital Universitario Nuestra Señora de Candelaria, Gastroenterology Unit, Tenerife, Spain, <sup>33</sup>Hospital Universitario Miguel Servet, Gastroenterology Unit, Zaragoza, Spain, <sup>34</sup>Hospital Universitario de Burgos, Gastroenterology Unit, Burgos, Spain, <sup>35</sup>Instituto Biodonostia- Universidad del País Vasco UPV/EHU y CIBEREHD, Gastroenterology Unit, Guipúzcoa, Spain, <sup>36</sup>Hospital General de Tomelloso. Instituto de Investigación Sanitaria Princesa IIS-IP. CIBEREHD, Gastroenterology Unit, Ciudad Real, Spain, <sup>37</sup>Hospital Universitario Infanta Sofía, Gastroenterology Unit, Madrid, Spain

**Background:** Prospective registries are necessary to evaluate the safety of inflammatory bowel disease (IBD) treatment during pregnancy and in children in the long term.

**Aims:** The overall aim of DUMBO registry is to know the risk of serious adverse events (SAEs) during pregnancy and in children up to 4 years of age exposed during pregnancy to drugs for IBD (mainly focused on biologics), compared to unexposed children. In this analysis we aim to evaluate the risk of SAEs during pregnancy and the predictive factors of it (mainly focused on IBD drugs).

**Methods:** Prospective, observational and multicentre registry, which enrolls pregnant women with IBD (Crohn's disease, ulcerative colitis, IBD-unclassified) over 5 years in 70 centres in Spain. The registry was kicked off in September 2019. SAE was defined based on "Clinical Safety Data Management: Definitions and Standards for Expedited Reporting by European Medicines Agency". Study protocol is summarized in figure 1.

**Results:** 433 women have been included so far; 241 got pregnant at least 9 months before this interim analysis (table 1).

Table 1. Patients' characteristics

|                    | %  |
|--------------------|----|
| Ulcerative colitis | 41 |
| Extensive colitis  | 35 |
| Left-sided colitis | 25 |
| Crohn's disease    | 58 |
| L1                 | 49 |
| L2                 | 13 |
| L3                 | 38 |
| B1                 | 72 |
| B2                 | 13 |
| B3                 | 15 |
| Perianal disease   | 25 |
| Previous surgery   | 20 |
| Formersmokers      | 27 |
| Comorbidities      | 28 |

Mean age was 34 years, and 17% of women had active disease at any time during pregnancy. 23% of pregnancies were exposed to immunomodulators (thiopurines), 25% to biologics and 10% to combo therapy (biologics and immunomodulators). 85 pregnancies (35%) were exposed to biologics (60 anti-TNF, 17 ustekinumab, and 8 vedolizumab) either in combo or in monotherapy. There were 237 newborns (227 singleton and 5 pair of twins), 9 miscarriages and 1 abortion. 72% of patients had vaginal delivery and 28% C-sections (18% due to perianal CD or active disease). A total of 59 pregnancies (24.5%) reported at least one SAE: 32% in exposed to biologics and 20.5% in non-exposed group ( $p>0.05$ ) (figure 2).

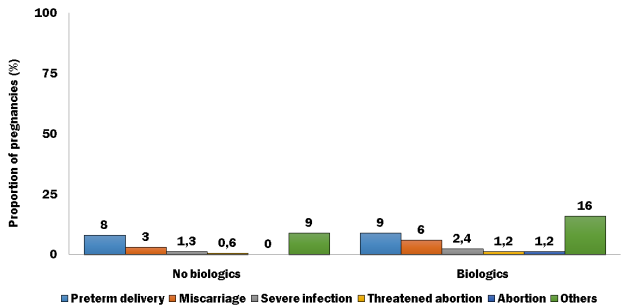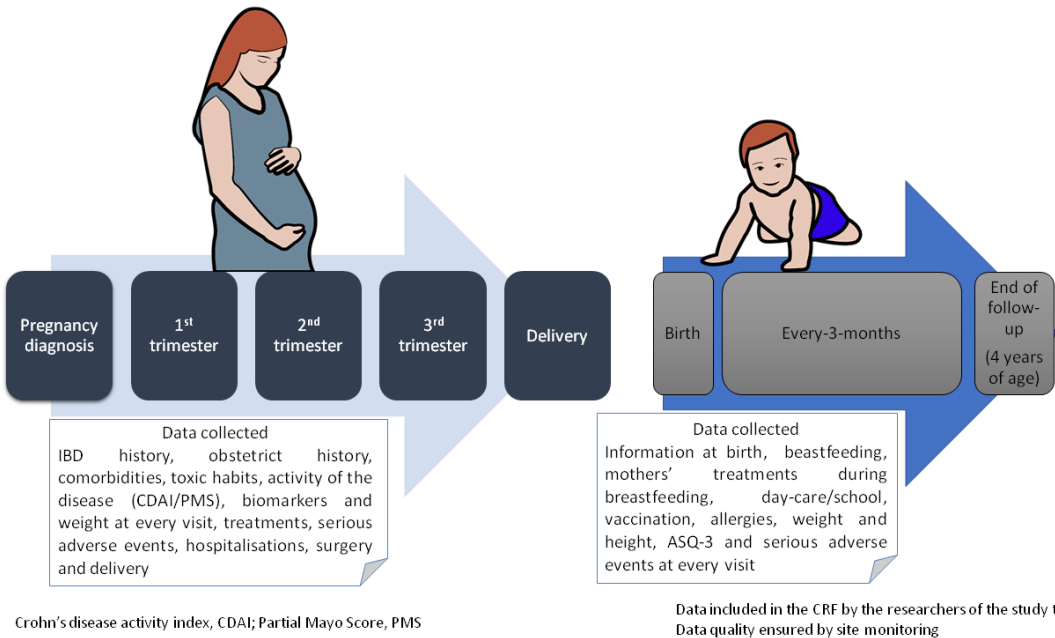

Abstract DOP52

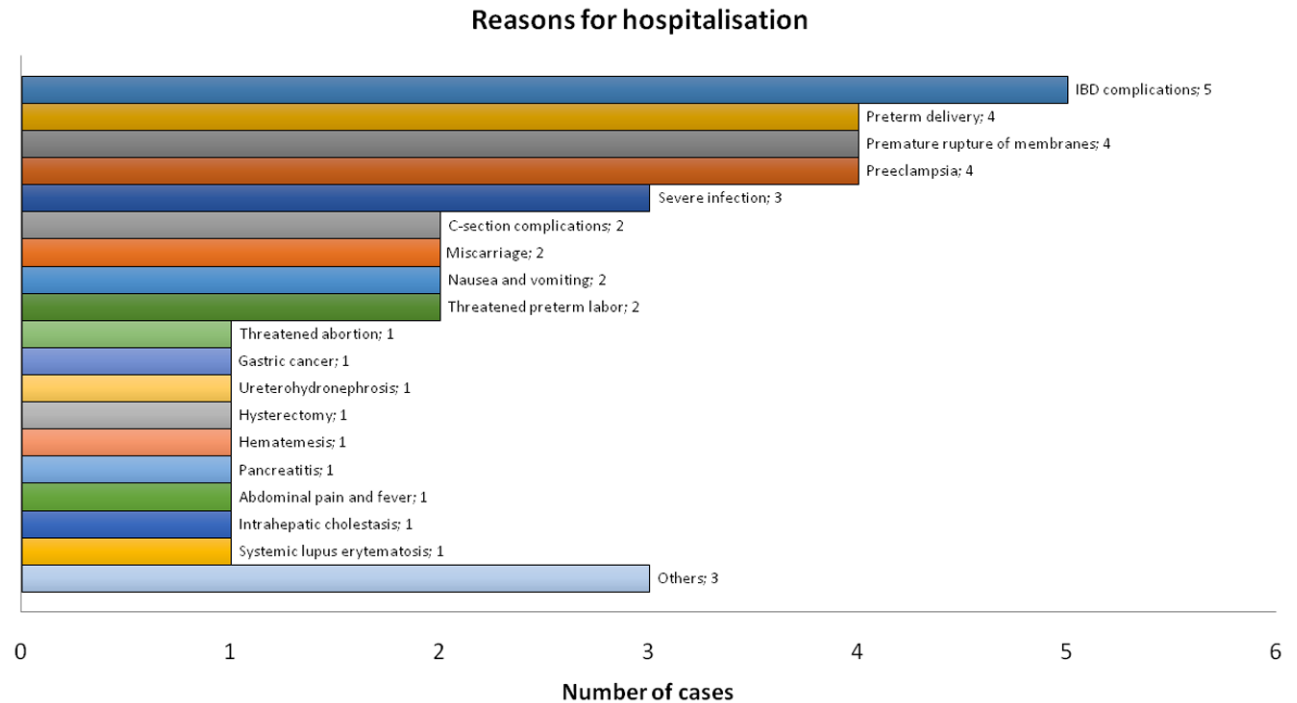

Four out of 17 pregnancies exposed to ustekinumab and 3 out of 8 exposed to vedolizumab had SAEs (non-related with the drug). In the multivariate analysis, adjusted by disease activity, in comparison with no immunosuppressive treatment, neither immunosuppressants [Odds ratio (OR)=1.1, 95% confidence interval (CI)=0.3–4.3] nor biologics in monotherapy or in combo (OR=0.8; 95%CI=0.2–3) were associated with higher risk of SAEs. 40 patients (17%) were hospitalised due to complications during pregnancy or delivery (figure 3).

Two patients underwent surgery during pregnancy due to IBD complications

**Conclusion:** IBD treatment (either immunomodulators or biologics) does not increase the risk of SAEs during pregnancy. Nevertheless, one-quarter of IBD women suffer SAEs during pregnancy and about 20% need hospitalisation, which should be taken into account when managing IBD during pregnancy.

DOP53

**Pregnancy outcomes in the ozanimod clinical development program in relapsing multiple sclerosis, Ulcerative Colitis, and Crohn’s Disease**

M.C. Dubinsky<sup>\*1</sup>, U. Mahadevan<sup>2</sup>, L. Charles<sup>3</sup>, S. Afsari<sup>3</sup>, A. Henry<sup>3</sup>, G. Comi<sup>4</sup>, K. Selmaj<sup>5</sup>, C.J. van der Woude<sup>6</sup>  
<sup>1</sup>Icahn School of Medicine, Pediatrics- Gastroenterology, Mount Sinai, United States, <sup>2</sup>University of California San Francisco, Gastroenterology, San Francisco, United States, <sup>3</sup>Bristol Myers Squibb, Global Drug Safety & Risk Mgmt, Princeton, United States,

<sup>4</sup>San Raffaele Scientific Institute- Vita-Salute San Raffaele University, Department of Neurology, Milan, Italy, <sup>5</sup>Center for Neurology- Łódź- Poland and Collegium Medicum- University of Warmia and Mazury, Department of Neurology, Olsztyn, Poland, <sup>6</sup>Erasmus MC, Gastroenterology, Rotterdam, Netherlands Antilles

**Background:** Ozanimod, an oral sphingosine 1-phosphate (S1P) receptor modulator selectively targeting S1P<sub>1</sub> and S1P<sub>3</sub>, has demonstrated efficacy in patients with relapsing multiple sclerosis (rMS) and ulcerative colitis (UC), and is being studied in Crohn’s disease (CD). S1P<sub>1-3</sub> receptors are involved in vascular formation during embryogenesis. Within studies in the ozanimod clinical development program, female participants of childbearing potential were required to use effective contraception while receiving and up to 3 months after discontinuing ozanimod; treatment discontinuation was required if pregnancy was confirmed. Here we review pregnancy outcomes data with ozanimod use in rMS, UC, and CD.

**Methods:** All pregnancies, including participant and partner pregnancies, in the ozanimod clinical development program with an initial diagnosis prior to a cut-off date of September 30, 2020 were assessed for pregnancy outcomes.

**Results:** At cut-off, safety data on 4131 participants were available. A total of 83 pregnancies were reported in the safety database of participants treated with ozanimod or their partners (Table). All pregnancy exposures occurred during the first trimester. Of the 60 pregnancies in ozanimod clinical trials, 9 were reported in patients with UC, and 3 in patients with CD. Participants discontinued study medication promptly except for those who elected pregnancy termination and did not discontinue study medication. Among all pregnancies in the ozanimod clinical development program, the incidence of spontaneous abortion in clinical trial participants was 15%; the
